# Supplementary material for: Global Healthspan-Lifespan Gaps Among 183 World Health Organization Member States
Source: PubMed Central journal article supplement (PMC11635540; doi:10.1001/jamanetworkopen.2024.50241), 2024-12-11
Supplement: jamanetwopen-e2450241-s001.pdf [file jamanetwopen-e2450241-s001.pdf]

## Supplemental Online Content

Garmany A, Terzic A. Global healthspan-lifespan gaps among 183 World Health Organization member states. *JAMA Netw Open*. 2024;7(12):e2450241. doi:10.1001/jamanetworkopen.2024.50241

**eTable 1.** Average Rate of Change in Life Expectancy and Health-Adjusted Life Expectancy Among World Health Organization Member States Between 2000 and 2019

**eTable 2.** The 2019 Healthspan-Lifespan Gap Across World Health Organization Member States Stratified by Sex

**eFigure 1.** Healthspan-Lifespan Gap for 183 World Health Organization Member States as a Function of Total Years Lived With Disability per 100,000 Persons

**eFigure 2.** Healthspan-Lifespan Gaps for 183 World Health Organization Member States as a Function of Total Years of Life Lost per 100,000 Persons

**eFigure 3.** The Sex Disparity (Women-Men) in the Healthspan-Lifespan Gap in 2019 as a Function of The Sex Disparity (Women-Men) in Years Lived With Disability (YLD) for Noncommunicable Diseases (NCD) per 100,000 Persons

**eFigure 4.** Years Lived With Disability (YLD) for Noncommunicable Diseases (NCD) and Injuries, and Communicable, Maternal, Perinatal and Nutritional Conditions (CMPN) for the United States of America Total Population, Men, and Women

This supplemental material has been provided by the authors to give readers additional information about their work.

eTable 1. Average Rate of Change in Life Expectancy and Health-Adjusted Life Expectancy Among World Health Organization Member States Between 2000 and 2019.

| <b>World Health Organization Member State</b> | <b>Average Change in Life Expectancy (years/calendar year)</b> | <b>Average Change in Health-Adjusted Life Expectancy (years/calendar year)</b> |
|-----------------------------------------------|----------------------------------------------------------------|--------------------------------------------------------------------------------|
| Afghanistan                                   | 0.41                                                           | 0.36                                                                           |
| Albania                                       | 0.22                                                           | 0.19                                                                           |
| Algeria                                       | 0.25                                                           | 0.18                                                                           |
| Angola                                        | 0.69                                                           | 0.60                                                                           |
| Antigua and Barbuda                           | 0.09                                                           | 0.07                                                                           |
| Argentina                                     | 0.12                                                           | 0.10                                                                           |
| Armenia                                       | 0.21                                                           | 0.18                                                                           |
| Australia                                     | 0.17                                                           | 0.12                                                                           |
| Austria                                       | 0.17                                                           | 0.14                                                                           |
| Azerbaijan                                    | 0.30                                                           | 0.26                                                                           |
| Bahamas                                       | 0.11                                                           | 0.08                                                                           |
| Bahrain                                       | 0.27                                                           | 0.20                                                                           |
| Bangladesh                                    | 0.43                                                           | 0.36                                                                           |
| Barbados                                      | 0.08                                                           | 0.05                                                                           |
| Belarus                                       | 0.30                                                           | 0.26                                                                           |
| Belgium                                       | 0.19                                                           | 0.14                                                                           |
| Belize                                        | 0.20                                                           | 0.15                                                                           |
| Benin                                         | 0.34                                                           | 0.30                                                                           |
| Bhutan                                        | 0.37                                                           | 0.31                                                                           |
| Bolivia                                       | 0.31                                                           | 0.27                                                                           |
| Bosnia and Herzegovina                        | 0.07                                                           | 0.05                                                                           |

|                                       |       |       |
|---------------------------------------|-------|-------|
| Botswana                              | 0.83  | 0.69  |
| Brazil                                | 0.22  | 0.19  |
| Brunei Darussalam                     | 0.11  | 0.09  |
| Bulgaria                              | 0.17  | 0.14  |
| Burkina Faso                          | 0.55  | 0.50  |
| Burundi                               | 1.00  | 0.87  |
| Cabo Verde                            | 0.15  | 0.14  |
| Cambodia                              | 0.57  | 0.51  |
| Cameroon                              | 0.48  | 0.42  |
| Canada                                | 0.16  | 0.09  |
| Central African Republic              | 0.44  | 0.38  |
| Chad                                  | 0.43  | 0.37  |
| Chile                                 | 0.20  | 0.15  |
| China                                 | 0.29  | 0.24  |
| Colombia                              | 0.28  | 0.24  |
| Comoros                               | 0.29  | 0.26  |
| Congo                                 | 0.63  | 0.54  |
| Costa Rica                            | 0.14  | 0.10  |
| Cote d'Ivoire                         | 0.63  | 0.54  |
| Croatia                               | 0.21  | 0.16  |
| Cuba                                  | 0.05  | 0.04  |
| Cyprus                                | 0.22  | 0.16  |
| Czechia                               | 0.21  | 0.14  |
| Democratic People's Republic of Korea | 0.43  | 0.36  |
| Democratic Republic of the Congo      | 0.50  | 0.44  |
| Denmark                               | 0.22  | 0.17  |
| Djibouti                              | 0.30  | 0.26  |
| Dominican Republic                    | -0.02 | -0.01 |

|                   |      |      |
|-------------------|------|------|
| Ecuador           | 0.20 | 0.16 |
| Egypt             | 0.10 | 0.09 |
| El Salvador       | 0.13 | 0.11 |
| Equatorial Guinea | 0.39 | 0.35 |
| Eritrea           | 0.48 | 0.44 |
| Estonia           | 0.40 | 0.33 |
| Eswatini          | 0.53 | 0.44 |
| Ethiopia          | 0.91 | 0.78 |
| Fiji              | 0.11 | 0.08 |
| Finland           | 0.20 | 0.16 |
| France            | 0.18 | 0.14 |
| Gabon             | 0.42 | 0.35 |
| Gambia            | 0.31 | 0.27 |
| Georgia           | 0.19 | 0.14 |
| Germany           | 0.18 | 0.12 |
| Ghana             | 0.35 | 0.30 |
| Greece            | 0.15 | 0.11 |
| Grenada           | 0.05 | 0.02 |
| Guatemala         | 0.26 | 0.22 |
| Guinea            | 0.34 | 0.29 |
| Guinea-Bissau     | 0.50 | 0.43 |
| Guyana            | 0.14 | 0.11 |
| Haiti             | 0.35 | 0.29 |
| Honduras          | 0.09 | 0.09 |
| Hungary           | 0.26 | 0.21 |
| Iceland           | 0.13 | 0.11 |
| India             | 0.43 | 0.37 |
| Indonesia         | 0.21 | 0.19 |

|                                  |      |      |
|----------------------------------|------|------|
| Iran                             | 0.24 | 0.18 |
| Iraq                             | 0.18 | 0.16 |
| Ireland                          | 0.27 | 0.20 |
| Israel                           | 0.20 | 0.16 |
| Italy                            | 0.18 | 0.14 |
| Jamaica                          | 0.09 | 0.06 |
| Japan                            | 0.16 | 0.13 |
| Jordan                           | 0.26 | 0.20 |
| Kazakhstan                       | 0.54 | 0.44 |
| Kenya                            | 0.61 | 0.54 |
| Kiribati                         | 0.18 | 0.15 |
| Kuwait                           | 0.16 | 0.12 |
| Kyrgyzstan                       | 0.41 | 0.36 |
| Lao People's Democratic Republic | 0.51 | 0.44 |
| Latvia                           | 0.26 | 0.23 |
| Lebanon                          | 0.09 | 0.06 |
| Lesotho                          | 0.15 | 0.11 |
| Liberia                          | 0.52 | 0.45 |
| Libya                            | 0.07 | 0.03 |
| Lithuania                        | 0.20 | 0.18 |
| Luxembourg                       | 0.21 | 0.16 |
| Madagascar                       | 0.33 | 0.30 |
| Malawi                           | 1.04 | 0.90 |
| Malaysia                         | 0.10 | 0.08 |
| Maldives                         | 0.43 | 0.38 |
| Mali                             | 0.51 | 0.45 |
| Malta                            | 0.20 | 0.15 |
| Mauritania                       | 0.32 | 0.27 |

|                   |      |      |
|-------------------|------|------|
| Mauritius         | 0.14 | 0.10 |
| Mexico            | 0.08 | 0.06 |
| Micronesia        | 0.09 | 0.07 |
| Mongolia          | 0.38 | 0.32 |
| Montenegro        | 0.12 | 0.09 |
| Morocco           | 0.18 | 0.15 |
| Mozambique        | 0.37 | 0.34 |
| Myanmar           | 0.46 | 0.40 |
| Namibia           | 0.56 | 0.47 |
| Nepal             | 0.28 | 0.25 |
| Netherlands       | 0.19 | 0.13 |
| New Zealand       | 0.17 | 0.12 |
| Nicaragua         | 0.09 | 0.09 |
| Niger             | 0.65 | 0.57 |
| Nigeria           | 0.45 | 0.40 |
| North Macedonia   | 0.19 | 0.15 |
| Norway            | 0.20 | 0.15 |
| Oman              | 0.24 | 0.19 |
| Pakistan          | 0.28 | 0.23 |
| Panama            | 0.10 | 0.07 |
| Papua New Guinea  | 0.10 | 0.09 |
| Paraguay          | 0.05 | 0.04 |
| Peru              | 0.27 | 0.23 |
| Philippines       | 0.07 | 0.07 |
| Poland            | 0.23 | 0.18 |
| Portugal          | 0.25 | 0.21 |
| Qatar             | 0.29 | 0.23 |
| Republic of Korea | 0.35 | 0.28 |

|                                  |      |      |
|----------------------------------|------|------|
| Republic of Moldova              | 0.32 | 0.26 |
| Romania                          | 0.21 | 0.18 |
| Russian Federation               | 0.40 | 0.34 |
| Rwanda                           | 1.08 | 0.95 |
| Saint Lucia                      | 0.06 | 0.03 |
| Saint Vincent and the Grenadines | 0.13 | 0.09 |
| Samoa                            | 0.10 | 0.07 |
| Sao Tome and Principe            | 0.35 | 0.30 |
| Saudi Arabia                     | 0.19 | 0.14 |
| Senegal                          | 0.50 | 0.43 |
| Serbia                           | 0.22 | 0.17 |
| Seychelles                       | 0.07 | 0.05 |
| Sierra Leone                     | 0.60 | 0.53 |
| Singapore                        | 0.24 | 0.20 |
| Slovakia                         | 0.25 | 0.19 |
| Slovenia                         | 0.26 | 0.21 |
| Solomon Islands                  | 0.14 | 0.10 |
| Somalia                          | 0.33 | 0.29 |
| South Africa                     | 0.48 | 0.38 |
| South Sudan                      | 0.43 | 0.36 |
| Spain                            | 0.21 | 0.15 |
| Sri Lanka                        | 0.25 | 0.20 |
| Sudan                            | 0.33 | 0.28 |
| Suriname                         | 0.08 | 0.05 |
| Sweden                           | 0.14 | 0.10 |
| Switzerland                      | 0.19 | 0.16 |
| Syrian Arab Republic             | 0.06 | 0.00 |
| Tajikistan                       | 0.20 | 0.18 |

|                             |       |       |
|-----------------------------|-------|-------|
| Thailand                    | 0.32  | 0.28  |
| Timor-Leste                 | 0.35  | 0.39  |
| Togo                        | 0.42  | 0.36  |
| Tonga                       | 0.08  | 0.06  |
| Trinidad and Tobago         | 0.32  | 0.24  |
| Tunisia                     | 0.15  | 0.10  |
| Turkiye                     | 0.21  | 0.17  |
| Turkmenistan                | 0.32  | 0.27  |
| Uganda                      | 0.90  | 0.78  |
| Ukraine                     | 0.27  | 0.23  |
| United Arab Emirates        | 0.14  | 0.11  |
| United Kingdom              | 0.18  | 0.13  |
| United Republic of Tanzania | 0.74  | 0.65  |
| United States of America    | 0.09  | 0.02  |
| Uruguay                     | 0.11  | 0.08  |
| Uzbekistan                  | 0.39  | 0.33  |
| Vanuatu                     | 0.07  | 0.05  |
| Venezuela                   | -0.01 | -0.01 |
| Viet Nam                    | 0.11  | 0.10  |
| Yemen                       | 0.20  | 0.15  |
| Zambia                      | 0.90  | 0.77  |
| Zimbabwe                    | 0.71  | 0.60  |



eTable 2. The 2019 Healthspan-Lifespan Gap Across World Health Organization Member States Stratified by Sex.

| World Health Organization Member State | Healthspan-Lifespan Gap Both Sexes (years) | Healthspan-Lifespan Gap Men (years) | Healthspan-Lifespan Gap Women (years) | Sex Disparity in Healthspan-Lifespan Gap (years) |
|----------------------------------------|--------------------------------------------|-------------------------------------|---------------------------------------|--------------------------------------------------|
| Afghanistan                            | 9.31                                       | 8.59                                | 9.96                                  | 1.37                                             |
| Albania                                | 8.90                                       | 8.25                                | 9.61                                  | 1.36                                             |
| Algeria                                | 10.73                                      | 9.53                                | 12.02                                 | 2.49                                             |
| Angola                                 | 8.26                                       | 7.10                                | 9.32                                  | 2.22                                             |
| Antigua and Barbuda                    | 9.45                                       | 8.68                                | 10.26                                 | 1.58                                             |
| Argentina                              | 9.48                                       | 8.11                                | 10.70                                 | 2.59                                             |
| Armenia                                | 8.93                                       | 7.59                                | 10.06                                 | 2.47                                             |
| Australia                              | 12.14                                      | 11.05                               | 13.14                                 | 2.09                                             |
| Austria                                | 10.75                                      | 9.54                                | 11.88                                 | 2.34                                             |
| Azerbaijan                             | 7.83                                       | 6.68                                | 8.89                                  | 2.21                                             |
| Bahamas                                | 8.81                                       | 7.55                                | 10.09                                 | 2.54                                             |
| Bahrain                                | 9.91                                       | 9.04                                | 11.52                                 | 2.48                                             |
| Bangladesh                             | 9.95                                       | 8.79                                | 11.24                                 | 2.45                                             |
| Barbados                               | 9.03                                       | 8.12                                | 9.96                                  | 1.84                                             |
| Belarus                                | 8.81                                       | 7.35                                | 10.22                                 | 2.87                                             |
| Belgium                                | 10.82                                      | 9.49                                | 12.21                                 | 2.72                                             |
| Belize                                 | 9.11                                       | 7.86                                | 10.47                                 | 2.61                                             |
| Benin                                  | 7.93                                       | 6.69                                | 9.06                                  | 2.37                                             |
| Bhutan                                 | 9.71                                       | 8.83                                | 10.89                                 | 2.06                                             |
| Bolivia                                | 8.84                                       | 7.95                                | 9.83                                  | 1.88                                             |
| Bosnia and Herzegovina                 | 9.55                                       | 8.68                                | 10.39                                 | 1.71                                             |
| Botswana                               | 8.35                                       | 7.05                                | 9.66                                  | 2.61                                             |
| Brazil                                 | 10.50                                      | 9.05                                | 11.99                                 | 2.94                                             |

|                                       |       |      |       |      |
|---------------------------------------|-------|------|-------|------|
| Brunei Darussalam                     | 8.72  | 8.19 | 9.26  | 1.07 |
| Bulgaria                              | 8.77  | 7.75 | 9.90  | 2.15 |
| Burkina Faso                          | 7.80  | 6.66 | 8.93  | 2.27 |
| Burundi                               | 8.24  | 7.55 | 8.94  | 1.39 |
| Cabo Verde                            | 9.23  | 7.70 | 10.74 | 3.04 |
| Cambodia                              | 8.62  | 7.43 | 9.75  | 2.32 |
| Cameroon                              | 7.86  | 6.79 | 8.90  | 2.11 |
| Canada                                | 10.94 | 9.90 | 12.05 | 2.15 |
| Central African Republic              | 6.70  | 5.71 | 7.86  | 2.15 |
| Chad                                  | 7.63  | 6.65 | 8.54  | 1.89 |
| Chile                                 | 10.74 | 9.09 | 12.15 | 3.06 |
| China                                 | 8.93  | 7.53 | 10.49 | 2.96 |
| Colombia                              | 10.31 | 9.29 | 11.37 | 2.08 |
| Comoros                               | 8.49  | 7.62 | 9.28  | 1.66 |
| Congo                                 | 8.54  | 7.41 | 9.51  | 2.10 |
| Costa Rica                            | 10.85 | 9.71 | 12.14 | 2.43 |
| Côte d'Ivoire                         | 8.12  | 7.13 | 9.31  | 2.18 |
| Croatia                               | 10.04 | 8.84 | 11.10 | 2.26 |
| Cuba                                  | 9.96  | 8.77 | 11.05 | 2.28 |
| Cyprus                                | 10.74 | 9.32 | 12.12 | 2.80 |
| Czechia                               | 10.33 | 9.30 | 11.33 | 2.03 |
| Democratic People's Republic of Korea | 7.63  | 5.99 | 9.09  | 3.10 |
| Democratic Republic of Congo          | 8.25  | 7.20 | 9.42  | 2.22 |
| Denmark                               | 10.32 | 8.89 | 11.62 | 2.73 |
| Djibouti                              | 7.81  | 6.90 | 8.88  | 1.98 |
| Dominican Republic                    | 8.84  | 7.66 | 10.09 | 2.43 |

|                   |       |      |       |      |
|-------------------|-------|------|-------|------|
| Ecuador           | 9.95  | 8.71 | 11.20 | 2.49 |
| Egypt             | 8.82  | 7.29 | 10.44 | 3.15 |
| El Salvador       | 10.13 | 8.98 | 11.33 | 2.35 |
| Equatorial Guinea | 8.29  | 7.47 | 9.48  | 2.01 |
| Eritrea           | 8.38  | 7.40 | 9.37  | 1.97 |
| Estonia           | 9.68  | 8.30 | 10.90 | 2.60 |
| Eswatini          | 7.63  | 6.26 | 9.38  | 3.12 |
| Ethiopia          | 8.80  | 7.90 | 9.72  | 1.82 |
| Fiji              | 8.41  | 7.43 | 9.58  | 2.15 |
| Finland           | 10.61 | 9.26 | 12.04 | 2.78 |
| France            | 10.38 | 8.66 | 11.99 | 3.33 |
| Gabon             | 8.87  | 7.59 | 10.43 | 2.84 |
| Gambia            | 8.47  | 7.02 | 9.95  | 2.93 |
| Georgia           | 8.58  | 7.39 | 9.86  | 2.47 |
| Germany           | 10.82 | 9.02 | 12.67 | 3.65 |
| Ghana             | 8.28  | 7.16 | 9.56  | 2.40 |
| Greece            | 10.20 | 8.74 | 11.67 | 2.93 |
| Grenada           | 8.98  | 8.03 | 9.93  | 1.90 |
| Guatemala         | 9.72  | 8.45 | 10.94 | 2.49 |
| Guinea            | 7.71  | 6.58 | 8.55  | 1.97 |
| Guinea-Bissau     | 7.62  | 6.26 | 8.88  | 2.62 |
| Guyana            | 8.49  | 7.35 | 9.69  | 2.34 |
| Haiti             | 8.25  | 7.44 | 8.96  | 1.52 |
| Honduras          | 8.94  | 7.97 | 9.86  | 1.89 |
| Hungary           | 9.24  | 8.09 | 10.29 | 2.20 |
| Iceland           | 10.33 | 9.11 | 11.57 | 2.46 |
| India             | 10.49 | 9.22 | 11.77 | 2.55 |
| Indonesia         | 8.51  | 7.50 | 9.50  | 2.00 |

|                                  |       |      |       |      |
|----------------------------------|-------|------|-------|------|
| Iran                             | 11.05 | 9.69 | 12.59 | 2.90 |
| Iraq                             | 9.72  | 8.33 | 11.27 | 2.94 |
| Ireland                          | 10.74 | 9.50 | 12.08 | 2.58 |
| Israel                           | 10.22 | 8.79 | 11.66 | 2.87 |
| Italy                            | 11.07 | 9.71 | 12.30 | 2.59 |
| Jamaica                          | 9.38  | 8.46 | 10.38 | 1.92 |
| Japan                            | 10.16 | 8.89 | 11.44 | 2.55 |
| Jordan                           | 10.27 | 8.92 | 11.58 | 2.66 |
| Kazakhstan                       | 8.95  | 7.58 | 10.21 | 2.63 |
| Kenya                            | 8.39  | 7.30 | 9.54  | 2.24 |
| Kiribati                         | 6.82  | 5.64 | 7.90  | 2.26 |
| Kuwait                           | 10.87 | 9.75 | 12.85 | 3.10 |
| Kyrgyzstan                       | 8.38  | 7.15 | 9.61  | 2.46 |
| Lao People's Democratic Republic | 8.01  | 6.99 | 9.05  | 2.06 |
| Latvia                           | 9.18  | 7.68 | 10.54 | 2.86 |
| Lebanon                          | 10.44 | 8.93 | 12.15 | 3.22 |
| Lesotho                          | 6.55  | 5.36 | 7.84  | 2.48 |
| Liberia                          | 9.18  | 8.25 | 10.00 | 1.75 |
| Libya                            | 10.58 | 9.31 | 11.84 | 2.53 |
| Lithuania                        | 9.29  | 7.83 | 10.73 | 2.90 |
| Luxembourg                       | 10.81 | 9.52 | 12.20 | 2.68 |
| Madagascar                       | 8.05  | 7.20 | 8.90  | 1.70 |
| Malawi                           | 8.52  | 7.21 | 9.93  | 2.72 |
| Malaysia                         | 9.02  | 8.11 | 10.18 | 2.07 |
| Maldives                         | 9.59  | 8.93 | 10.76 | 1.83 |
| Mali                             | 8.20  | 7.40 | 8.90  | 1.50 |
| Malta                            | 10.39 | 9.04 | 11.90 | 2.86 |

|                   |       |       |       |      |
|-------------------|-------|-------|-------|------|
| Mauritania        | 8.58  | 7.88  | 9.33  | 1.45 |
| Mauritius         | 10.17 | 8.95  | 11.42 | 2.47 |
| Mexico            | 10.21 | 8.83  | 11.66 | 2.83 |
| Micronesia        | 7.03  | 5.95  | 8.25  | 2.30 |
| Mongolia          | 7.80  | 6.72  | 8.96  | 2.24 |
| Montenegro        | 8.88  | 7.95  | 9.95  | 2.00 |
| Morocco           | 9.29  | 7.98  | 10.61 | 2.63 |
| Mozambique        | 7.74  | 6.56  | 8.93  | 2.37 |
| Myanmar           | 8.23  | 7.11  | 9.40  | 2.29 |
| Namibia           | 8.48  | 7.18  | 9.85  | 2.67 |
| Nepal             | 9.58  | 8.28  | 10.65 | 2.37 |
| Netherlands       | 10.39 | 9.10  | 11.65 | 2.55 |
| New Zealand       | 11.76 | 10.76 | 12.72 | 1.96 |
| Nicaragua         | 9.54  | 8.37  | 10.73 | 2.36 |
| Niger             | 7.79  | 6.76  | 8.76  | 2.00 |
| Nigeria           | 8.22  | 7.30  | 9.20  | 1.90 |
| Norway            | 11.22 | 10.08 | 12.53 | 2.45 |
| Oman              | 9.20  | 8.47  | 10.76 | 2.29 |
| Pakistan          | 8.71  | 7.69  | 9.92  | 2.23 |
| Panama            | 10.59 | 9.25  | 12.06 | 2.81 |
| Papua New Guinea  | 8.20  | 7.20  | 9.26  | 2.06 |
| Paraguay          | 10.01 | 8.58  | 11.55 | 2.97 |
| Peru              | 10.40 | 9.26  | 11.54 | 2.28 |
| Philippines       | 8.43  | 7.30  | 9.70  | 2.40 |
| Poland            | 9.57  | 8.63  | 10.63 | 2.00 |
| Portugal          | 10.57 | 8.96  | 12.20 | 3.24 |
| Qatar             | 10.07 | 9.93  | 11.53 | 1.60 |
| Republic of Korea | 10.20 | 9.02  | 11.39 | 2.37 |

|                                  |       |      |       |      |
|----------------------------------|-------|------|-------|------|
| Republic of Moldova              | 8.76  | 7.36 | 10.02 | 2.66 |
| North Macedonia                  | 8.72  | 7.74 | 9.57  | 1.83 |
| Romania                          | 8.77  | 7.65 | 9.86  | 2.21 |
| Russian Federation               | 9.03  | 7.48 | 10.50 | 3.02 |
| Rwanda                           | 8.90  | 7.88 | 9.84  | 1.96 |
| Saint Lucia                      | 9.63  | 8.30 | 11.11 | 2.81 |
| Saint Vincent and the Grenadines | 9.22  | 8.42 | 10.22 | 1.80 |
| Samoa                            | 8.35  | 7.36 | 9.35  | 1.99 |
| Sao Tome and Principe            | 8.82  | 7.89 | 9.79  | 1.90 |
| Saudi Arabia                     | 10.31 | 9.31 | 11.75 | 2.44 |
| Senegal                          | 9.18  | 8.02 | 10.24 | 2.22 |
| Serbia                           | 8.97  | 8.06 | 9.88  | 1.82 |
| Seychelles                       | 9.34  | 8.08 | 10.75 | 2.67 |
| Sierra Leone                     | 7.87  | 7.10 | 8.60  | 1.50 |
| Singapore                        | 9.62  | 8.65 | 10.75 | 2.10 |
| Slovakia                         | 9.73  | 8.64 | 10.64 | 2.00 |
| Slovenia                         | 10.61 | 9.59 | 11.56 | 1.97 |
| Solomon Islands                  | 7.45  | 6.37 | 8.77  | 2.40 |
| Somalia                          | 6.77  | 5.71 | 7.92  | 2.21 |
| South Africa                     | 9.05  | 7.60 | 10.59 | 2.99 |
| South Sudan                      | 9.09  | 7.93 | 10.34 | 2.41 |
| Spain                            | 11.12 | 9.38 | 12.78 | 3.40 |
| Sri Lanka                        | 9.87  | 8.70 | 10.81 | 2.11 |
| Sudan                            | 9.25  | 7.95 | 10.46 | 2.51 |
| Suriname                         | 9.08  | 7.80 | 10.43 | 2.63 |
| Sweden                           | 10.50 | 9.13 | 11.87 | 2.74 |
| Switzerland                      | 10.95 | 9.55 | 12.28 | 2.73 |

|                             |       |       |       |      |
|-----------------------------|-------|-------|-------|------|
| Syrian Arab Republic        | 9.77  | 8.68  | 10.96 | 2.28 |
| Tajikistan                  | 7.50  | 6.68  | 8.35  | 1.67 |
| Thailand                    | 9.40  | 8.46  | 10.44 | 1.98 |
| Timor-Leste                 | 8.72  | 8.13  | 9.41  | 1.28 |
| Togo                        | 8.07  | 6.82  | 9.43  | 2.61 |
| Tonga                       | 8.57  | 7.11  | 10.11 | 3.00 |
| Trinidad and Tobago         | 9.93  | 8.54  | 11.32 | 2.78 |
| Tunisia                     | 10.14 | 8.78  | 11.49 | 2.71 |
| Türkiye                     | 10.22 | 8.64  | 11.67 | 3.03 |
| Turkmenistan                | 7.65  | 6.58  | 8.67  | 2.09 |
| Uganda                      | 8.49  | 7.24  | 9.70  | 2.46 |
| Ukraine                     | 8.72  | 7.40  | 10.01 | 2.61 |
| United Arab Emirates        | 10.08 | 9.30  | 12.22 | 2.92 |
| United Kingdom              | 11.30 | 10.19 | 12.39 | 2.20 |
| United Republic of Tanzania | 8.84  | 7.77  | 9.96  | 2.19 |
| United States of America    | 12.40 | 11.08 | 13.73 | 2.65 |
| Uruguay                     | 9.60  | 8.08  | 11.06 | 2.98 |
| Uzbekistan                  | 8.31  | 7.26  | 9.41  | 2.15 |
| Vanuatu                     | 7.51  | 6.26  | 8.92  | 2.66 |
| Venezuela                   | 9.55  | 8.01  | 11.07 | 3.06 |
| Viet Nam                    | 8.44  | 7.16  | 9.81  | 2.65 |
| Yemen                       | 9.13  | 7.51  | 10.72 | 3.21 |
| Zambia                      | 8.05  | 7.04  | 9.07  | 2.03 |
| Zimbabwe                    | 7.58  | 6.31  | 8.81  | 2.50 |

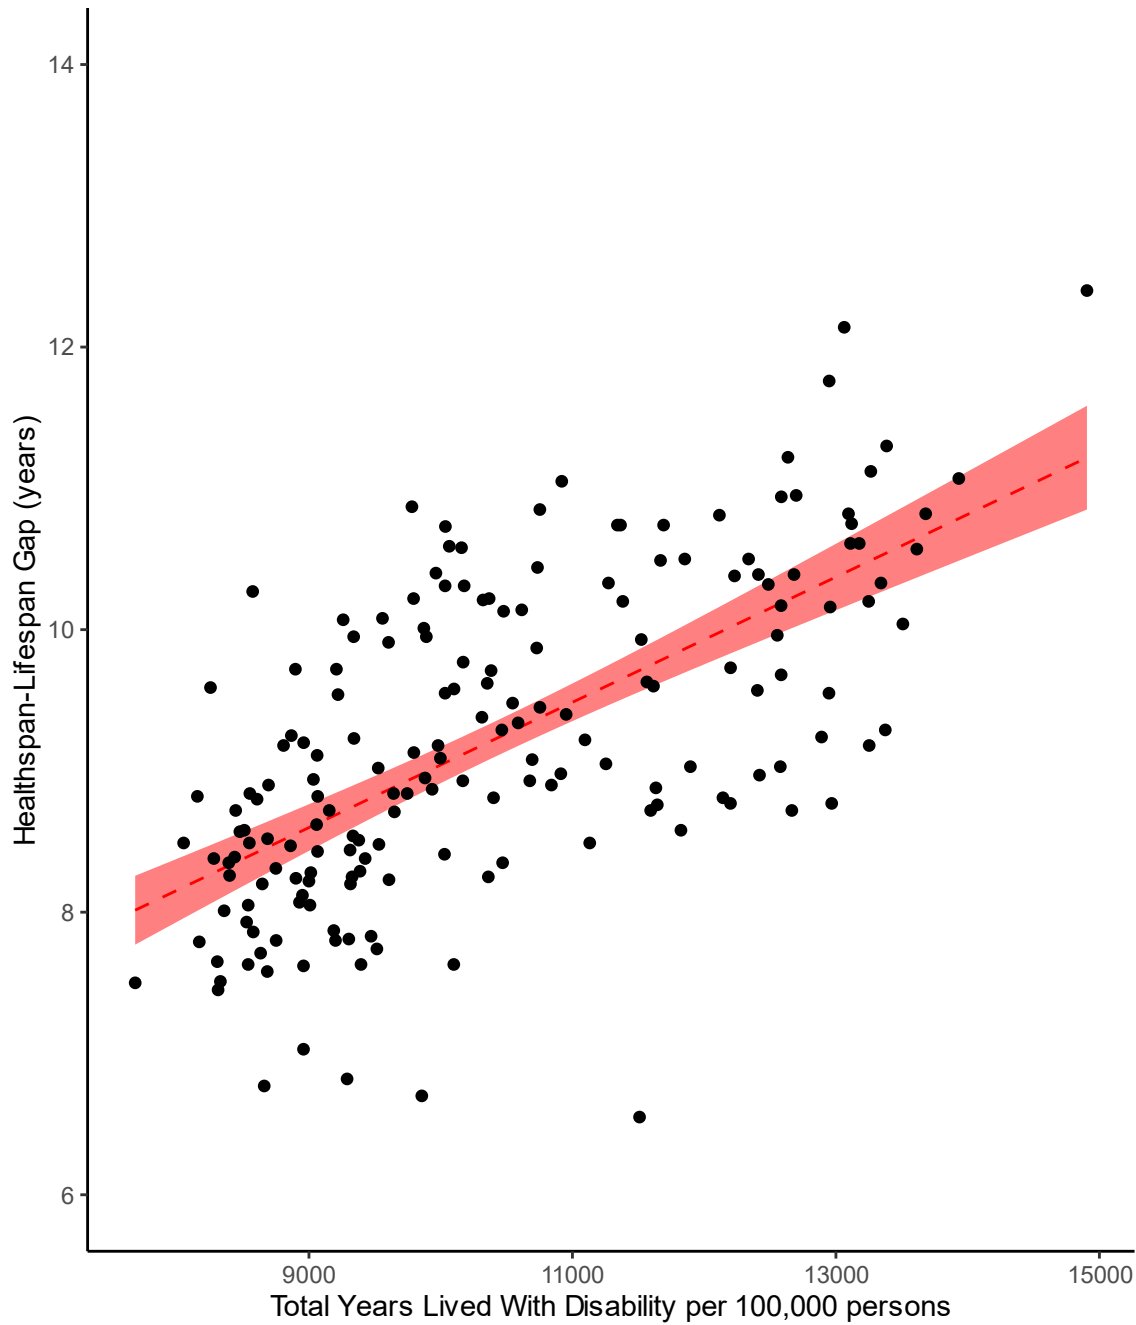

**eFigure 1. Healthspan-lifespan gap for 183 World Health Organization member states as a function of total years lived with disability per 100,000 persons.** Dashed line represents the line of best fit with the ribbon representing the 95% confidence interval.



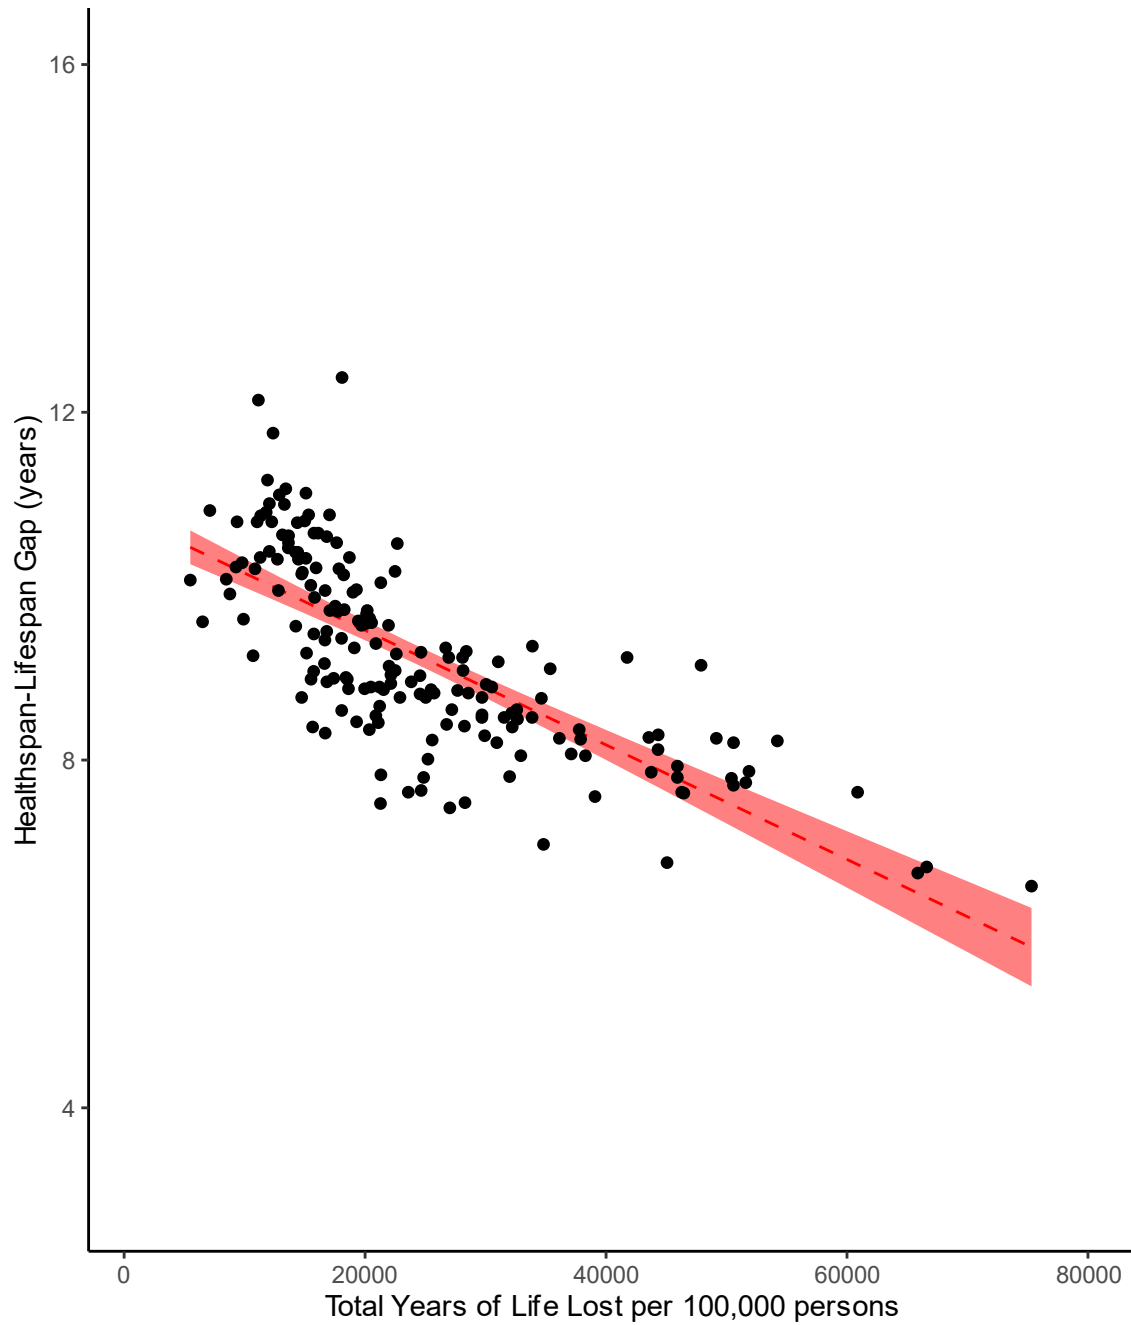

**eFigure 2. Healthspan-lifespan gaps for 183 World Health Organization member states as a function of total years of life lost per 100,000 persons.** Dashed line represents the line of best fit with the ribbon representing the 95% confidence interval.

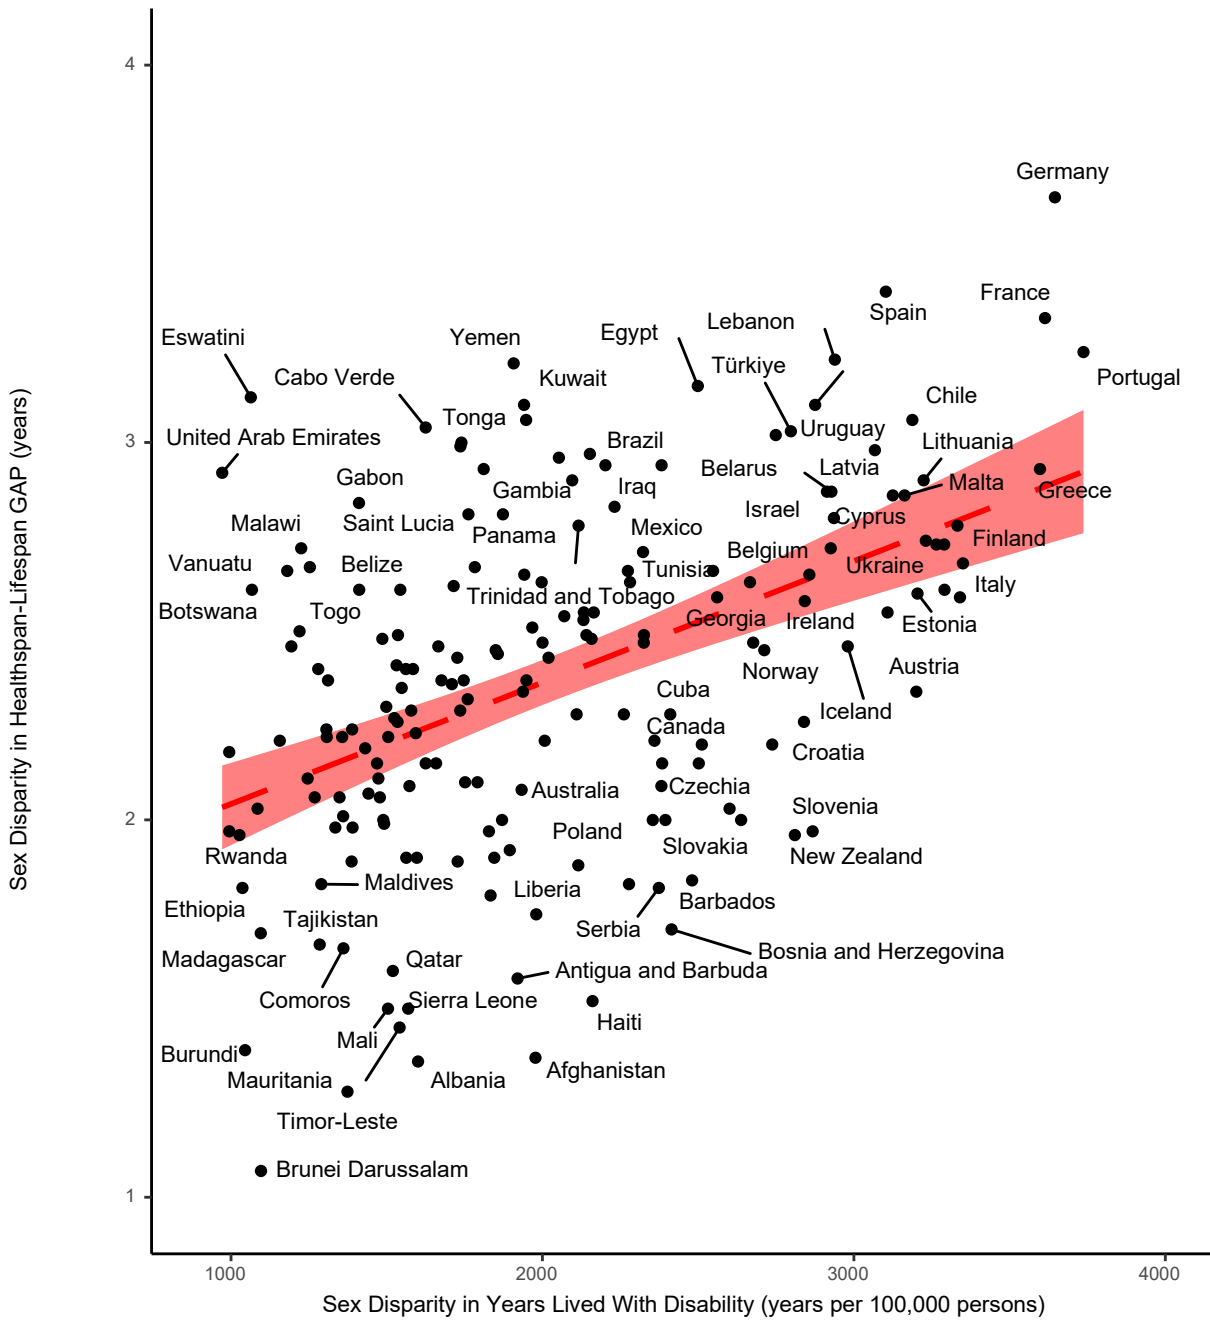

**eFigure 3. The sex disparity (Women-Men) in the healthspan-lifespan gap in 2019 as a function of the sex disparity (Women-Men) in years lived with disability (YLD) for noncommunicable diseases (NCD) per 100,000 persons. Dashed line represents the line of best fit with the ribbon representing the 95% confidence interval.**

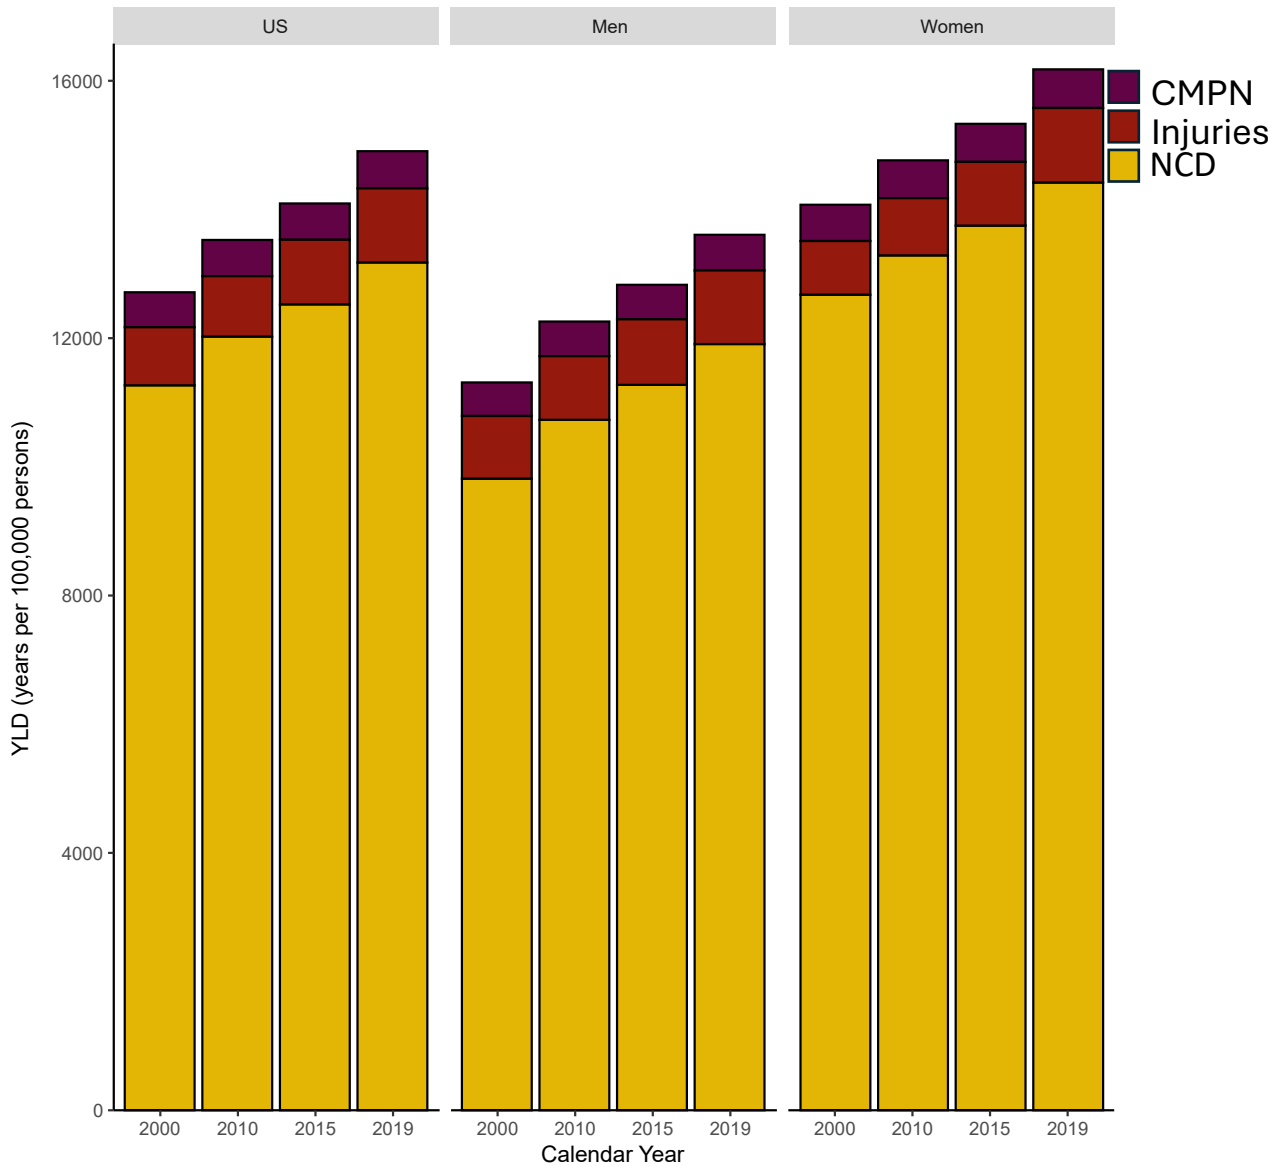

**eFigure 4. Years lived with disability (YLD) for noncommunicable diseases (NCD) and injuries, and communicable, maternal, perinatal and nutritional conditions (CMPN) for the United States of America total population, men, and women.**
