# Supplementary material for: Global Healthspan-Lifespan Gaps Among 183 World Health Organization Member States
Source: PubMed Central journal article supplement (PMC11635540; doi:10.1001/jamanetworkopen.2024.50241), 2024-12-11
Supplement: jamanetwopen-e2450241-s002.pdf [file jamanetwopen-e2450241-s002.pdf]

## Data Sharing Statement

Garmany. Global Healthspan-Lifespan Gaps Among 183 World Health Organization Member States. *JAMA Netw Open*. Published December 11, 2024.

doi:10.1001/jamanetworkopen.2024.50241

### Data

**Data available:** No

### Additional Information

**Explanation for why data not available:** The data are publicly available through the World Health Organization Global Health Observatory.
